# Supplementary material for: Simulation-based training and assessment of non-technical skills in the Norwegian Helicopter Emergency Medical Services: a cross-sectional survey
Source: PubMed Central journal article supplement — Emerg Med J. 2014 Oct 24;32(8):647–53. doi: 10.1136/emermed-2014-203962 (PMC4518743; doi:10.1136/emermed-2014-203962), 2014-10-24
Supplement: emermed-2014-203962-s2.pdf [file emermed-2014-203962-s2.pdf]

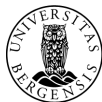

# Spørreundersøkelse om pasientsikkerhet i prehospitaler tjenester

## Veiledning

- Undersøkelsen kartlegger ditt syn på pasientsikkerhet, uønskede hendelser og hendelsesrapportering i den prehospitaler tjenesten der du jobber.
- En lenke til et tilsvarende elektronisk skjema er sendt deg på e-post. Du kan velge om du vil fylle ut elektronisk eller på papir. Om du ikke har fått tilsendt lenke er det ønskelig at du benytter papirskjema.
- Undersøkelsen er anonym, besvarelsen behandles strengt konfidensielt og din identitet vil ikke kunne spores.
- Les utsagnene nøye. Vær ærlig når du svarer. For hvert av utsagnene krysser du av for det alternativet som passer best.
- Det tar ca 15 min å fylle ut skjemaet.
- Bruk blå eller svart penn. Marker dine valg med et kryss.
- Utfylt skjema postlegges i ferdig frankert returkonvolutt snarest

- En "**uønsket hendelse**" er definert som en utilsiktet hendelse som følge av medisinsk undersøkelse og/eller behandling.
- "**Din enhet**" er definert som den prehospitaler basen eller stasjonen du primært arbeider ved. EKSEMPEL: En ambulansestasjon og en helikopterbase som geografisk er lokalisert på samme sted og tilhører samme helseforetak, betraktes her som ulike prehospitaler enheter
- Med uttrykkene "**hos oss**" og "**ledelsen**" refereres fortrinnsvis til enheten hvor du arbeider primært, og til lederne i denne enheten.

## A: Generelt om arbeidet og pasientsikkerhet

Hvor enig eller uenig er du i følgende uttalelser?

| Tenk på din enhet...                                                                                         | Helt uenig<br>▼            | Uenig<br>▼                 | Både/og<br>▼               | Enig<br>▼                  | Helt enig<br>▼             |
|--------------------------------------------------------------------------------------------------------------|----------------------------|----------------------------|----------------------------|----------------------------|----------------------------|
| 1. I vår enhet støtter vi hverandre .....                                                                    | <input type="checkbox"/> 1 | <input type="checkbox"/> 2 | <input type="checkbox"/> 3 | <input type="checkbox"/> 4 | <input type="checkbox"/> 5 |
| 2. Vi er tilstrekkelig personell til å håndtere arbeidsmengden .....                                         | <input type="checkbox"/> 1 | <input type="checkbox"/> 2 | <input type="checkbox"/> 3 | <input type="checkbox"/> 4 | <input type="checkbox"/> 5 |
| 3. Når det er mange oppgaver som skal gjøres raskt arbeider vi sammen som et team for å løse oppgavene ..... | <input type="checkbox"/> 1 | <input type="checkbox"/> 2 | <input type="checkbox"/> 3 | <input type="checkbox"/> 4 | <input type="checkbox"/> 5 |
| 4. I vår enhet behandler vi hverandre med respekt .....                                                      | <input type="checkbox"/> 1 | <input type="checkbox"/> 2 | <input type="checkbox"/> 3 | <input type="checkbox"/> 4 | <input type="checkbox"/> 5 |
| 5. I vår enhet jobber vi lengre vakter enn hva som er best for pasientene ...                                | <input type="checkbox"/> 1 | <input type="checkbox"/> 2 | <input type="checkbox"/> 3 | <input type="checkbox"/> 4 | <input type="checkbox"/> 5 |
| 6. Vi jobber aktivt for å forbedre pasientsikkerheten.....                                                   | <input type="checkbox"/> 1 | <input type="checkbox"/> 2 | <input type="checkbox"/> 3 | <input type="checkbox"/> 4 | <input type="checkbox"/> 5 |
| 7. Vi bruker flere vikarer enn det som er til det beste for pasientbehandlingen.....                         | <input type="checkbox"/> 1 | <input type="checkbox"/> 2 | <input type="checkbox"/> 3 | <input type="checkbox"/> 4 | <input type="checkbox"/> 5 |
| 8. Ansatte føler at feil blir brukt mot dem .....                                                            | <input type="checkbox"/> 1 | <input type="checkbox"/> 2 | <input type="checkbox"/> 3 | <input type="checkbox"/> 4 | <input type="checkbox"/> 5 |

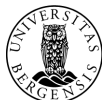**A: Generelt om arbeidet og pasientsikkerhet (forts.)**

| <b>Tenk på din enhet...</b>                                                                                      | Helt<br>uenig<br>▼                    | Uenig<br>▼                            | Både/og<br>▼                          | Enig<br>▼                             | Helt enig<br>▼                        |
|------------------------------------------------------------------------------------------------------------------|---------------------------------------|---------------------------------------|---------------------------------------|---------------------------------------|---------------------------------------|
| 9. Feil (og uønskede hendelser) er blitt brukt for å få til positive forandringer her .....                      | <input type="checkbox"/> <sub>1</sub> | <input type="checkbox"/> <sub>2</sub> | <input type="checkbox"/> <sub>3</sub> | <input type="checkbox"/> <sub>4</sub> | <input type="checkbox"/> <sub>5</sub> |
| 10. Det er kun en tilfeldighet at det ikke skjer flere alvorlige feil her i enheten .....                        | <input type="checkbox"/> <sub>1</sub> | <input type="checkbox"/> <sub>2</sub> | <input type="checkbox"/> <sub>3</sub> | <input type="checkbox"/> <sub>4</sub> | <input type="checkbox"/> <sub>5</sub> |
| 11. Når ett område i enheten er overbelastet hjelper andre i enheten til .....                                   | <input type="checkbox"/> <sub>1</sub> | <input type="checkbox"/> <sub>2</sub> | <input type="checkbox"/> <sub>3</sub> | <input type="checkbox"/> <sub>4</sub> | <input type="checkbox"/> <sub>5</sub> |
| 12. Når en uheldig hendelse blir rapportert, føles det som om personen og ikke problemet, kommer i sentrum ..... | <input type="checkbox"/> <sub>1</sub> | <input type="checkbox"/> <sub>2</sub> | <input type="checkbox"/> <sub>3</sub> | <input type="checkbox"/> <sub>4</sub> | <input type="checkbox"/> <sub>5</sub> |
| 13. Når vi har gjennomført endringer for å forbedre pasientsikkerheten, evaluerer vi effekten .....              | <input type="checkbox"/> <sub>1</sub> | <input type="checkbox"/> <sub>2</sub> | <input type="checkbox"/> <sub>3</sub> | <input type="checkbox"/> <sub>4</sub> | <input type="checkbox"/> <sub>5</sub> |
| 14. Vi jobber i "krisemodus" hvor vi forsøker å gjøre for mye, alt for raskt .....                               | <input type="checkbox"/> <sub>1</sub> | <input type="checkbox"/> <sub>2</sub> | <input type="checkbox"/> <sub>3</sub> | <input type="checkbox"/> <sub>4</sub> | <input type="checkbox"/> <sub>5</sub> |
| 15. Pasientsikkerhet blir aldri nedprioritert for å få unna mer arbeid .....                                     | <input type="checkbox"/> <sub>1</sub> | <input type="checkbox"/> <sub>2</sub> | <input type="checkbox"/> <sub>3</sub> | <input type="checkbox"/> <sub>4</sub> | <input type="checkbox"/> <sub>5</sub> |
| 16. Ansatte er bekymret for at feilene de gjør blir registrert i deres personalmapper .....                      | <input type="checkbox"/> <sub>1</sub> | <input type="checkbox"/> <sub>2</sub> | <input type="checkbox"/> <sub>3</sub> | <input type="checkbox"/> <sub>4</sub> | <input type="checkbox"/> <sub>5</sub> |
| 17. Vi har problemer med pasientsikkerheten i vår enhet .....                                                    | <input type="checkbox"/> <sub>1</sub> | <input type="checkbox"/> <sub>2</sub> | <input type="checkbox"/> <sub>3</sub> | <input type="checkbox"/> <sub>4</sub> | <input type="checkbox"/> <sub>5</sub> |
| 18. Våre prosedyrer og systemer fungerer godt for å forhindre uønskede hendelser .....                           | <input type="checkbox"/> <sub>1</sub> | <input type="checkbox"/> <sub>2</sub> | <input type="checkbox"/> <sub>3</sub> | <input type="checkbox"/> <sub>4</sub> | <input type="checkbox"/> <sub>5</sub> |
| 19. Jeg ber mine kollegaer stanse arbeid som jeg mener blir utført på en risikabel måte .....                    | <input type="checkbox"/> <sub>1</sub> | <input type="checkbox"/> <sub>2</sub> | <input type="checkbox"/> <sub>3</sub> | <input type="checkbox"/> <sub>4</sub> | <input type="checkbox"/> <sub>5</sub> |
| 20. Jeg melder fra dersom jeg ser farlige situasjoner .....                                                      | <input type="checkbox"/> <sub>1</sub> | <input type="checkbox"/> <sub>2</sub> | <input type="checkbox"/> <sub>3</sub> | <input type="checkbox"/> <sub>4</sub> | <input type="checkbox"/> <sub>5</sub> |

**B: Om sikkerheten til de ansatte**

Er du enig eller uenig i følgende uttalelser?

| <b>Tenk på din enhet...</b>                                                                            | Helt<br>uenig<br>▼                    | Uenig<br>▼                            | Både/og<br>▼                          | Enig<br>▼                             | Helt enig<br>▼                        |
|--------------------------------------------------------------------------------------------------------|---------------------------------------|---------------------------------------|---------------------------------------|---------------------------------------|---------------------------------------|
| 1. Mine kollegaer stopper meg dersom jeg arbeider på en usikker måte .....                             | <input type="checkbox"/> <sub>1</sub> | <input type="checkbox"/> <sub>2</sub> | <input type="checkbox"/> <sub>3</sub> | <input type="checkbox"/> <sub>4</sub> | <input type="checkbox"/> <sub>5</sub> |
| 2. Jeg stopper å arbeide dersom jeg mener at det kan være farlig for meg eller andre å fortsette ..... | <input type="checkbox"/> <sub>1</sub> | <input type="checkbox"/> <sub>2</sub> | <input type="checkbox"/> <sub>3</sub> | <input type="checkbox"/> <sub>4</sub> | <input type="checkbox"/> <sub>5</sub> |

**C: Din nærmeste leder**

Er du enig eller uenig i følgende uttalelser om din nærmeste overordnede eller den person, du refererer til?

|                                                                                                                                                             | Helt<br>uenig<br>▼                    | Uenig<br>▼                            | Både/og<br>▼                          | Enig<br>▼                             | Helt enig<br>▼                        |
|-------------------------------------------------------------------------------------------------------------------------------------------------------------|---------------------------------------|---------------------------------------|---------------------------------------|---------------------------------------|---------------------------------------|
| 1. Lederen min uttrykker seg positivt når han/hun ser arbeidet blir utført i overensstemmelse med våre prosedyrer for å ivareta pasientenes sikkerhet ..... | <input type="checkbox"/> <sub>1</sub> | <input type="checkbox"/> <sub>2</sub> | <input type="checkbox"/> <sub>3</sub> | <input type="checkbox"/> <sub>4</sub> | <input type="checkbox"/> <sub>5</sub> |
| 2. Lederen min vurderer personalets forslag om forbedringer av pasientsikkerheten .....                                                                     | <input type="checkbox"/> <sub>1</sub> | <input type="checkbox"/> <sub>2</sub> | <input type="checkbox"/> <sub>3</sub> | <input type="checkbox"/> <sub>4</sub> | <input type="checkbox"/> <sub>5</sub> |
| 3. Når arbeidspresset øker, ønsker vår leder at vi arbeider raskere selv om det kan bety at man må ta "snarveier" .....                                     | <input type="checkbox"/> <sub>1</sub> | <input type="checkbox"/> <sub>2</sub> | <input type="checkbox"/> <sub>3</sub> | <input type="checkbox"/> <sub>4</sub> | <input type="checkbox"/> <sub>5</sub> |
| 4. Lederen min overser problemer med hensyn til pasientenes sikkerhet selv om en hendelse skjer gang på gang .....                                          | <input type="checkbox"/> <sub>1</sub> | <input type="checkbox"/> <sub>2</sub> | <input type="checkbox"/> <sub>3</sub> | <input type="checkbox"/> <sub>4</sub> | <input type="checkbox"/> <sub>5</sub> |

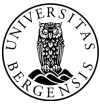**D: Kommunikasjon**

Hvor ofte skjer følgende innenfor ditt arbeidsområde/fagområde?

| Tenk på din enhet...                                                                                               | Aldri<br>▼                            | Sjelden<br>▼                          | Av og<br>til<br>▼                     | Ofte<br>▼                             | Alltid<br>▼                           |
|--------------------------------------------------------------------------------------------------------------------|---------------------------------------|---------------------------------------|---------------------------------------|---------------------------------------|---------------------------------------|
| 1. Vi får tilbakemeldinger om endringer som blir igangsatt basert på rapporterte uønskede hendelser.....           | <input type="checkbox"/> <sub>1</sub> | <input type="checkbox"/> <sub>2</sub> | <input type="checkbox"/> <sub>3</sub> | <input type="checkbox"/> <sub>4</sub> | <input type="checkbox"/> <sub>5</sub> |
| 2. Ansatte snakker åpent ut hvis de ser noe som kan påvirke pasientbehandlingen i negativ retning .....            | <input type="checkbox"/> <sub>1</sub> | <input type="checkbox"/> <sub>2</sub> | <input type="checkbox"/> <sub>3</sub> | <input type="checkbox"/> <sub>4</sub> | <input type="checkbox"/> <sub>5</sub> |
| 3. Vi blir informert om uønskede hendelser som skjer i vår enhet.....                                              | <input type="checkbox"/> <sub>1</sub> | <input type="checkbox"/> <sub>2</sub> | <input type="checkbox"/> <sub>3</sub> | <input type="checkbox"/> <sub>4</sub> | <input type="checkbox"/> <sub>5</sub> |
| 4. Ansatte kan fritt stille spørsmål vedrørende beslutninger og handlinger tatt av personer med mer autoritet..... | <input type="checkbox"/> <sub>1</sub> | <input type="checkbox"/> <sub>2</sub> | <input type="checkbox"/> <sub>3</sub> | <input type="checkbox"/> <sub>4</sub> | <input type="checkbox"/> <sub>5</sub> |
| 5. I denne enheten diskuterer vi hvordan vi kan forebygge at de samme uønskede hendelsene gjentas.....             | <input type="checkbox"/> <sub>1</sub> | <input type="checkbox"/> <sub>2</sub> | <input type="checkbox"/> <sub>3</sub> | <input type="checkbox"/> <sub>4</sub> | <input type="checkbox"/> <sub>5</sub> |
| 6. Ansatte er redde for å stille spørsmål når det er noe som virker feil .....                                     | <input type="checkbox"/> <sub>1</sub> | <input type="checkbox"/> <sub>2</sub> | <input type="checkbox"/> <sub>3</sub> | <input type="checkbox"/> <sub>4</sub> | <input type="checkbox"/> <sub>5</sub> |

**E: Vurdering av pasientsikkerheten**

Gi en generell vurdering av pasientsikkerheten i din enhet.

|                          |                          |                          |                          |                          |
|--------------------------|--------------------------|--------------------------|--------------------------|--------------------------|
| <input type="checkbox"/> |
| <b>A</b>                 | <b>B</b>                 | <b>C</b>                 | <b>D</b>                 | <b>E</b>                 |
| Fremragende              | Meget god                | Akseptabel               | Dårlig                   | Meget dårlig             |

**F: Hyppighet av rapporterte uønskede hendelser**

Hvor ofte blir nærhendelser rapportert (det vil si hendelser som blir oppdaget og avverget før de rekker å skade pasienten)?

| Tenk på din enhet...                                                                                                                               | Aldri<br>▼                            | Sjelden<br>▼                          | Av og<br>til<br>▼                     | Ofte<br>▼                             | Alltid<br>▼                           |
|----------------------------------------------------------------------------------------------------------------------------------------------------|---------------------------------------|---------------------------------------|---------------------------------------|---------------------------------------|---------------------------------------|
| 1. Hvor ofte blir nærhendelser rapportert - det vil si hendelser som blir <u>oppdaget og avverget så pasienten ikke rekker å bli skadet?</u> ..... | <input type="checkbox"/> <sub>1</sub> | <input type="checkbox"/> <sub>2</sub> | <input type="checkbox"/> <sub>3</sub> | <input type="checkbox"/> <sub>4</sub> | <input type="checkbox"/> <sub>5</sub> |
| 2. Hvor ofte blir feil som på <u>ingen måte kan skade en pasient</u> rapportert?...                                                                | <input type="checkbox"/> <sub>1</sub> | <input type="checkbox"/> <sub>2</sub> | <input type="checkbox"/> <sub>3</sub> | <input type="checkbox"/> <sub>4</sub> | <input type="checkbox"/> <sub>5</sub> |
| 3. Hvor ofte blir potensielt skadevoldende feil rapportert - det vil si feil som <u>kunne skade pasienten</u> , men som ikke gjorde det? .....     | <input type="checkbox"/> <sub>1</sub> | <input type="checkbox"/> <sub>2</sub> | <input type="checkbox"/> <sub>3</sub> | <input type="checkbox"/> <sub>4</sub> | <input type="checkbox"/> <sub>5</sub> |

**G: Antall uønskede hendelser som blir rapportert**Hvor mange rapporter om uønskede hendelser har du fylt ut og videresendt innenfor de seneste 12 månedene?

- |                                             |                                                      |
|---------------------------------------------|------------------------------------------------------|
| <input type="checkbox"/> a. Ingen rapporter | <input type="checkbox"/> d. 6-10 rapporter           |
| <input type="checkbox"/> b. 1-2 rapporter   | <input type="checkbox"/> e. 11-20 rapporter          |
| <input type="checkbox"/> c. 3- 5 rapporter  | <input type="checkbox"/> f. 21 rapporter eller flere |

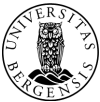**H: Om det prehospitale systemet**

Er du enig eller uenig i følgende uttalelser om det prehospitale systemet?.

|                                                                                                            | Helt uenig<br>▼                       | Uenig<br>▼                            | Både/og<br>▼                          | Enig<br>▼                             | Helt enig<br>▼                        |
|------------------------------------------------------------------------------------------------------------|---------------------------------------|---------------------------------------|---------------------------------------|---------------------------------------|---------------------------------------|
| Tenk på systemet som helhet...                                                                             |                                       |                                       |                                       |                                       |                                       |
| 1. Systemledelsen tilrettelegger for et arbeidsklima som fremmer pasientsikkerheten.....                   | <input type="checkbox"/> <sub>1</sub> | <input type="checkbox"/> <sub>2</sub> | <input type="checkbox"/> <sub>3</sub> | <input type="checkbox"/> <sub>4</sub> | <input type="checkbox"/> <sub>5</sub> |
| 2. Prehospitale enheter er ikke flinke til å koordinere seg med hverandre ...                              | <input type="checkbox"/> <sub>1</sub> | <input type="checkbox"/> <sub>2</sub> | <input type="checkbox"/> <sub>3</sub> | <input type="checkbox"/> <sub>4</sub> | <input type="checkbox"/> <sub>5</sub> |
| 3. Ting "faller mellom stoler" når pasienter blir overflyttet fra en enhet til en annen.....               | <input type="checkbox"/> <sub>1</sub> | <input type="checkbox"/> <sub>2</sub> | <input type="checkbox"/> <sub>3</sub> | <input type="checkbox"/> <sub>4</sub> | <input type="checkbox"/> <sub>5</sub> |
| 4. Samarbeidet fungerer godt mellom enheter som har behov for å jobbe sammen .....                         | <input type="checkbox"/> <sub>1</sub> | <input type="checkbox"/> <sub>2</sub> | <input type="checkbox"/> <sub>3</sub> | <input type="checkbox"/> <sub>4</sub> | <input type="checkbox"/> <sub>5</sub> |
| 5. Informasjon som er viktig i pasientbehandlingen går ofte tapt ved pasientoverlevering.....              | <input type="checkbox"/> <sub>1</sub> | <input type="checkbox"/> <sub>2</sub> | <input type="checkbox"/> <sub>3</sub> | <input type="checkbox"/> <sub>4</sub> | <input type="checkbox"/> <sub>5</sub> |
| 6. Det er ofte vanskelig å arbeide sammen med personale fra andre enheter.....                             | <input type="checkbox"/> <sub>1</sub> | <input type="checkbox"/> <sub>2</sub> | <input type="checkbox"/> <sub>3</sub> | <input type="checkbox"/> <sub>4</sub> | <input type="checkbox"/> <sub>5</sub> |
| 7. Det oppstår ofte problemer i forbindelse med utveksling av informasjon mellom prehospitale enheter..... | <input type="checkbox"/> <sub>1</sub> | <input type="checkbox"/> <sub>2</sub> | <input type="checkbox"/> <sub>3</sub> | <input type="checkbox"/> <sub>4</sub> | <input type="checkbox"/> <sub>5</sub> |
| 8. Toppleidelsens handlinger viser at pasientsikkerheten har topp prioritet..                              | <input type="checkbox"/> <sub>1</sub> | <input type="checkbox"/> <sub>2</sub> | <input type="checkbox"/> <sub>3</sub> | <input type="checkbox"/> <sub>4</sub> | <input type="checkbox"/> <sub>5</sub> |
| 9. Ledelsen virker kun interessert i pasientsikkerhet etter at en uønsket hendelse har skjedd.....         | <input type="checkbox"/> <sub>1</sub> | <input type="checkbox"/> <sub>2</sub> | <input type="checkbox"/> <sub>3</sub> | <input type="checkbox"/> <sub>4</sub> | <input type="checkbox"/> <sub>5</sub> |
| 10. Prehospitale enheter arbeider godt sammen for å sikre at pasienten får den beste behandlingen .....    | <input type="checkbox"/> <sub>1</sub> | <input type="checkbox"/> <sub>2</sub> | <input type="checkbox"/> <sub>3</sub> | <input type="checkbox"/> <sub>4</sub> | <input type="checkbox"/> <sub>5</sub> |
| 11. Pasientoverlevering er problematisk for pasientene prehospitalt .....                                  | <input type="checkbox"/> <sub>1</sub> | <input type="checkbox"/> <sub>2</sub> | <input type="checkbox"/> <sub>3</sub> | <input type="checkbox"/> <sub>4</sub> | <input type="checkbox"/> <sub>5</sub> |

**I: Opplæring og trening**1. I hvilken eller hvilke av de prehospitale ferdighetene nedenfor fikk du systematisk opplæring **FØR** du begynte å jobbe prehospitalt?

|                                                        | Opplæring<br>▼                        | INGEN opplæring<br>▼                  |
|--------------------------------------------------------|---------------------------------------|---------------------------------------|
| Sett <b>ett kryss</b> for hver av kategoriene a til g. |                                       |                                       |
| a. Beslutningstaking.....                              | <input type="checkbox"/> <sub>1</sub> | <input type="checkbox"/> <sub>2</sub> |
| b. Ledelse.....                                        | <input type="checkbox"/> <sub>1</sub> | <input type="checkbox"/> <sub>2</sub> |
| c. Kommunikasjon.....                                  | <input type="checkbox"/> <sub>1</sub> | <input type="checkbox"/> <sub>2</sub> |
| d. Situasjonsbevissthet.....                           | <input type="checkbox"/> <sub>1</sub> | <input type="checkbox"/> <sub>2</sub> |
| e. Teamarbeid.....                                     | <input type="checkbox"/> <sub>1</sub> | <input type="checkbox"/> <sub>2</sub> |
| f. Mestring av stress.....                             | <input type="checkbox"/> <sub>1</sub> | <input type="checkbox"/> <sub>2</sub> |
| g. Mestring av tretthet/fatigue.....                   | <input type="checkbox"/> <sub>1</sub> | <input type="checkbox"/> <sub>2</sub> |

2. Hvor mange ganger har du, i løpet av de **siste 12 månedene**, deltatt på reelle prehospitale oppdrag sammen med en kollega **fra samme yrkesgruppe**, for erfaringsutveksling?

- a. Ingen       b. 1-2 ganger       c. 3-5 ganger       d. Mer enn 5 ganger



**3. Angi omfanget av teoretisk opplæring du har fått i hver av de prehospitalene ferdighetene nedenfor.**

|                                                        | 0 timer<br>▼                          | 0-3 timer<br>▼                        | 3-7 timer<br>▼                        | 7-14 timer<br>▼                       | Mer enn 14 timer<br>▼                 |
|--------------------------------------------------------|---------------------------------------|---------------------------------------|---------------------------------------|---------------------------------------|---------------------------------------|
| Sett <b>ett kryss for hver</b> av kategoriene a til g. |                                       |                                       |                                       |                                       |                                       |
| a. Beslutningstaking.....                              | <input type="checkbox"/> <sub>1</sub> | <input type="checkbox"/> <sub>2</sub> | <input type="checkbox"/> <sub>3</sub> | <input type="checkbox"/> <sub>4</sub> | <input type="checkbox"/> <sub>5</sub> |
| b. Ledelse .....                                       | <input type="checkbox"/> <sub>1</sub> | <input type="checkbox"/> <sub>2</sub> | <input type="checkbox"/> <sub>3</sub> | <input type="checkbox"/> <sub>4</sub> | <input type="checkbox"/> <sub>5</sub> |
| c. Kommunikasjon .....                                 | <input type="checkbox"/> <sub>1</sub> | <input type="checkbox"/> <sub>2</sub> | <input type="checkbox"/> <sub>3</sub> | <input type="checkbox"/> <sub>4</sub> | <input type="checkbox"/> <sub>5</sub> |
| d. Situasjonsbevissthet .....                          | <input type="checkbox"/> <sub>1</sub> | <input type="checkbox"/> <sub>2</sub> | <input type="checkbox"/> <sub>3</sub> | <input type="checkbox"/> <sub>4</sub> | <input type="checkbox"/> <sub>5</sub> |
| e. Teamarbeid.....                                     | <input type="checkbox"/> <sub>1</sub> | <input type="checkbox"/> <sub>2</sub> | <input type="checkbox"/> <sub>3</sub> | <input type="checkbox"/> <sub>4</sub> | <input type="checkbox"/> <sub>5</sub> |
| f. Mestring av stress.....                             | <input type="checkbox"/> <sub>1</sub> | <input type="checkbox"/> <sub>2</sub> | <input type="checkbox"/> <sub>3</sub> | <input type="checkbox"/> <sub>4</sub> | <input type="checkbox"/> <sub>5</sub> |
| g. Mestring av tretthet/fatigue .....                  | <input type="checkbox"/> <sub>1</sub> | <input type="checkbox"/> <sub>2</sub> | <input type="checkbox"/> <sub>3</sub> | <input type="checkbox"/> <sub>4</sub> | <input type="checkbox"/> <sub>5</sub> |

**4. Angi omfanget av praktisk opplæring du har fått i hver av de prehospitalene ferdighetene nedenfor.**

|                                                        | 0 timer<br>▼                          | 0-3 timer<br>▼                        | 3-7 timer<br>▼                        | 7-14 timer<br>▼                       | Mer enn 14 timer<br>▼                 |
|--------------------------------------------------------|---------------------------------------|---------------------------------------|---------------------------------------|---------------------------------------|---------------------------------------|
| Sett <b>ett kryss for hver</b> av kategoriene a til g. |                                       |                                       |                                       |                                       |                                       |
| a. Beslutningstaking.....                              | <input type="checkbox"/> <sub>1</sub> | <input type="checkbox"/> <sub>2</sub> | <input type="checkbox"/> <sub>3</sub> | <input type="checkbox"/> <sub>4</sub> | <input type="checkbox"/> <sub>5</sub> |
| b. Ledelse .....                                       | <input type="checkbox"/> <sub>1</sub> | <input type="checkbox"/> <sub>2</sub> | <input type="checkbox"/> <sub>3</sub> | <input type="checkbox"/> <sub>4</sub> | <input type="checkbox"/> <sub>5</sub> |
| c. Kommunikasjon .....                                 | <input type="checkbox"/> <sub>1</sub> | <input type="checkbox"/> <sub>2</sub> | <input type="checkbox"/> <sub>3</sub> | <input type="checkbox"/> <sub>4</sub> | <input type="checkbox"/> <sub>5</sub> |
| d. Situasjonsbevissthet .....                          | <input type="checkbox"/> <sub>1</sub> | <input type="checkbox"/> <sub>2</sub> | <input type="checkbox"/> <sub>3</sub> | <input type="checkbox"/> <sub>4</sub> | <input type="checkbox"/> <sub>5</sub> |
| e. Teamarbeid.....                                     | <input type="checkbox"/> <sub>1</sub> | <input type="checkbox"/> <sub>2</sub> | <input type="checkbox"/> <sub>3</sub> | <input type="checkbox"/> <sub>4</sub> | <input type="checkbox"/> <sub>5</sub> |
| f. Mestring av stress.....                             | <input type="checkbox"/> <sub>1</sub> | <input type="checkbox"/> <sub>2</sub> | <input type="checkbox"/> <sub>3</sub> | <input type="checkbox"/> <sub>4</sub> | <input type="checkbox"/> <sub>5</sub> |
| g. Mestring av tretthet/fatigue .....                  | <input type="checkbox"/> <sub>1</sub> | <input type="checkbox"/> <sub>2</sub> | <input type="checkbox"/> <sub>3</sub> | <input type="checkbox"/> <sub>4</sub> | <input type="checkbox"/> <sub>5</sub> |

**5. Opplever du, per idag, noen av dine prehospitalene ferdigheter som mangelfulle i forhold til de utfordringene som er påregnelige i jobben prehospitalt?**

|                                                        | Mangelfull<br>▼                       | IKKE mangelfull<br>▼                  |
|--------------------------------------------------------|---------------------------------------|---------------------------------------|
| Sett <b>ett kryss for hver</b> av kategoriene a til g. |                                       |                                       |
| a. Beslutningstaking.....                              | <input type="checkbox"/> <sub>1</sub> | <input type="checkbox"/> <sub>2</sub> |
| b. Ledelse.....                                        | <input type="checkbox"/> <sub>1</sub> | <input type="checkbox"/> <sub>2</sub> |
| c. Kommunikasjon.....                                  | <input type="checkbox"/> <sub>1</sub> | <input type="checkbox"/> <sub>2</sub> |
| d. Situasjonsbevissthet.....                           | <input type="checkbox"/> <sub>1</sub> | <input type="checkbox"/> <sub>2</sub> |
| e. Teamarbeid.....                                     | <input type="checkbox"/> <sub>1</sub> | <input type="checkbox"/> <sub>2</sub> |
| f. Mestring av stress.....                             | <input type="checkbox"/> <sub>1</sub> | <input type="checkbox"/> <sub>2</sub> |
| g. Mestring av tretthet/fatigue.....                   | <input type="checkbox"/> <sub>1</sub> | <input type="checkbox"/> <sub>2</sub> |



**6. Hvor mange ganger i løpet av 2011 deltok du på tverrfaglig prehospital simuleringstrening der du helt spesifikt fikk trent en eller flere av følgende ferdigheter, sammen med dine naturlige samarbeidspartnere?**

|                                                        | 0 ganger<br>▼              | 1-2<br>ganger<br>▼         | 3-5<br>ganger<br>▼         | Mer enn<br>5 ganger<br>▼   |
|--------------------------------------------------------|----------------------------|----------------------------|----------------------------|----------------------------|
| <b>Sett ett kryss for hver av kategoriene a til g.</b> |                            |                            |                            |                            |
| a. Beslutningstaking.....                              | <input type="checkbox"/> 1 | <input type="checkbox"/> 2 | <input type="checkbox"/> 3 | <input type="checkbox"/> 4 |
| b. Ledelse .....                                       | <input type="checkbox"/> 1 | <input type="checkbox"/> 2 | <input type="checkbox"/> 3 | <input type="checkbox"/> 4 |
| c. Kommunikasjon .....                                 | <input type="checkbox"/> 1 | <input type="checkbox"/> 2 | <input type="checkbox"/> 3 | <input type="checkbox"/> 4 |
| d. Situasjonsbevissthet .....                          | <input type="checkbox"/> 1 | <input type="checkbox"/> 2 | <input type="checkbox"/> 3 | <input type="checkbox"/> 4 |
| e. Teamarbeid.....                                     | <input type="checkbox"/> 1 | <input type="checkbox"/> 2 | <input type="checkbox"/> 3 | <input type="checkbox"/> 4 |
| f. Mestring av stress.....                             | <input type="checkbox"/> 1 | <input type="checkbox"/> 2 | <input type="checkbox"/> 3 | <input type="checkbox"/> 4 |
| g. Mestring av tretthet/fatigue .....                  | <input type="checkbox"/> 1 | <input type="checkbox"/> 2 | <input type="checkbox"/> 3 | <input type="checkbox"/> 4 |

**7. Hvor mange ganger i løpet av 2011 ble følgende av dine prehospitalt ferdigheter systematisk observert og evaluert?**

|                                                        | 0 ganger<br>▼              | 1-2<br>ganger<br>▼         | 3-5<br>ganger<br>▼         | Mer enn<br>5 ganger<br>▼   |
|--------------------------------------------------------|----------------------------|----------------------------|----------------------------|----------------------------|
| <b>Sett ett kryss for hver av kategoriene a til g.</b> |                            |                            |                            |                            |
| a. Beslutningstaking.....                              | <input type="checkbox"/> 1 | <input type="checkbox"/> 2 | <input type="checkbox"/> 3 | <input type="checkbox"/> 4 |
| b. Ledelse .....                                       | <input type="checkbox"/> 1 | <input type="checkbox"/> 2 | <input type="checkbox"/> 3 | <input type="checkbox"/> 4 |
| c. Kommunikasjon .....                                 | <input type="checkbox"/> 1 | <input type="checkbox"/> 2 | <input type="checkbox"/> 3 | <input type="checkbox"/> 4 |
| d. Situasjonsbevissthet .....                          | <input type="checkbox"/> 1 | <input type="checkbox"/> 2 | <input type="checkbox"/> 3 | <input type="checkbox"/> 4 |
| e. Teamarbeid.....                                     | <input type="checkbox"/> 1 | <input type="checkbox"/> 2 | <input type="checkbox"/> 3 | <input type="checkbox"/> 4 |
| f. Mestring av stress.....                             | <input type="checkbox"/> 1 | <input type="checkbox"/> 2 | <input type="checkbox"/> 3 | <input type="checkbox"/> 4 |
| g. Mestring av tretthet/fatigue .....                  | <input type="checkbox"/> 1 | <input type="checkbox"/> 2 | <input type="checkbox"/> 3 | <input type="checkbox"/> 4 |

**8. Tilfredstiller dine prehospitalt ferdigheter gjeldende anbefalinger til kompetanse, for din yrkesgruppe, innenfor kategoriene nedenfor?**

|                                                        | Ja<br>▼                    | Nei<br>▼                   | Vet ikke<br>▼              |
|--------------------------------------------------------|----------------------------|----------------------------|----------------------------|
| <b>Sett ett kryss for hver av kategoriene a til g.</b> |                            |                            |                            |
| a. Beslutningstaking.....                              | <input type="checkbox"/> 1 | <input type="checkbox"/> 2 | <input type="checkbox"/> 3 |
| b. Ledelse.....                                        | <input type="checkbox"/> 1 | <input type="checkbox"/> 2 | <input type="checkbox"/> 3 |
| c. Kommunikasjon.....                                  | <input type="checkbox"/> 1 | <input type="checkbox"/> 2 | <input type="checkbox"/> 3 |
| d. Situasjonsbevissthet.....                           | <input type="checkbox"/> 1 | <input type="checkbox"/> 2 | <input type="checkbox"/> 3 |
| e. Teamarbeid.....                                     | <input type="checkbox"/> 1 | <input type="checkbox"/> 2 | <input type="checkbox"/> 3 |
| f. Mestring av stress.....                             | <input type="checkbox"/> 1 | <input type="checkbox"/> 2 | <input type="checkbox"/> 3 |
| g. Mestring av tretthet/fatigue.....                   | <input type="checkbox"/> 1 | <input type="checkbox"/> 2 | <input type="checkbox"/> 3 |

**J: Bakgrunnsinformasjon****1. Hva er ditt primære arbeidsområde/fagområde? Velg ETT svar eller spesifiser nærmere.**

- |                                                      |                                                        |                                                          |
|------------------------------------------------------|--------------------------------------------------------|----------------------------------------------------------|
| <input type="checkbox"/> a. Ambulansehelikopter      | <input type="checkbox"/> d. Legebemannet bil/ambulanse | <input type="checkbox"/> g. Ambulansebåt                 |
| <input type="checkbox"/> b. Redningshelikopter (SAR) | <input type="checkbox"/> e. Intensivambulanse          | <input type="checkbox"/> h. Annet, vennligst spesifiser: |
| <input type="checkbox"/> c. Ambulansefly             | <input type="checkbox"/> f. Ambulansebil               |                                                          |

**2. Hvor er din primære prehospital enhet geografisk lokalisert? Velg ETT svar eller spesifiser nærmere.**

- |                                         |                                        |                                                          |
|-----------------------------------------|----------------------------------------|----------------------------------------------------------|
| <input type="checkbox"/> a. Alta        | <input type="checkbox"/> h. Florø      | <input type="checkbox"/> o. Stavanger                    |
| <input type="checkbox"/> b. Arendal     | <input type="checkbox"/> i. Førde      | <input type="checkbox"/> p. Tromsø                       |
| <input type="checkbox"/> c. Banak       | <input type="checkbox"/> j. Gardermoen | <input type="checkbox"/> q. Trondheim                    |
| <input type="checkbox"/> d. Bergen      | <input type="checkbox"/> k. Kirkenes   | <input type="checkbox"/> r. Ørland                       |
| <input type="checkbox"/> e. Bodø        | <input type="checkbox"/> l. Lørenskog  | <input type="checkbox"/> s. Ål                           |
| <input type="checkbox"/> f. Brønnøysund | <input type="checkbox"/> m. Rygge      | <input type="checkbox"/> t. Ålesund                      |
| <input type="checkbox"/> g. Dombås      | <input type="checkbox"/> n. Sola       | <input type="checkbox"/> u. Annet, vennligst spesifiser: |

**3. Er din stilling forbundet med direkte kontakt med pasienter?**

- a. JA, jeg har direkte kontakt med pasienter.
- b. NEI, jeg har ikke direkte kontakt med pasienter.

**4. Hvilken faggruppe tilhører du? Velg det svaret som best beskriver din stilling.**

- |                                                                   |                                                                 |
|-------------------------------------------------------------------|-----------------------------------------------------------------|
| <input type="checkbox"/> a. Pilot                                 | <input type="checkbox"/> g. Lege, spesialist i anesthesiologi   |
| <input type="checkbox"/> b. Redningsmann                          | <input type="checkbox"/> h. Ambulansearbeider                   |
| <input type="checkbox"/> c. Spesialsykepleier, anestesi           | <input type="checkbox"/> i. Paramedic                           |
| <input type="checkbox"/> d. Spesialsykepleier, intensiv           | <input type="checkbox"/> j. Systemoperatør                      |
| <input type="checkbox"/> e. Sykepleier                            | <input type="checkbox"/> k. Maskinist                           |
| <input type="checkbox"/> f. Lege i spesialisering, anesthesiologi | <input type="checkbox"/> l. Annet, please vennligst spesifiser: |

**5. Hvor lenge har du arbeidet prehospitalt?**

- |                                             |                                             |
|---------------------------------------------|---------------------------------------------|
| <input type="checkbox"/> a. Mindre enn 1 år | <input type="checkbox"/> d. 11 til 15 år    |
| <input type="checkbox"/> b. 1 til 5 år      | <input type="checkbox"/> e. 16 til 20 år    |
| <input type="checkbox"/> c. 6 til 10 år     | <input type="checkbox"/> f. 21 år eller mer |



**6. Hva er det maksimale antallet timer du rutinemessig har sammenhengende vakt prehospitalt?**

- a. 7-12 timer
- b. 13-24 timer
- c. 25-48 timer (1-2 døgn)
- d. 49-72 timer (2-3 døgn)
- e. 73-96 timer (3-4 døgn)
- f. 97-168 timer (4-7 døgn)
- g. Over 169 timer (7 døgn)

**7. Hvor lenge har du arbeidet i din nåværende spesialitet eller fag?**

- a. Mindre enn 1 år
- b. 1-5 år
- c. 6 til 10 år
- d. 11 til 15 år
- e. 16 til 20 år
- f. 21 år eller mer

**K: Dine kommentarer**

Tenk på trusler mot pasientsikkerheten...

**1. Nevn de 3 hyppigst forekommende uønskede hendelser som du har observert eller forårsaket prehospitalt?**

**2. Nevn 3 tiltak som du mener vil kunne bedre pasientsikkerheten prehospitalt.**

**3. Her kan du fritt skrive dine kommentarer til pasientsikkerhet, feil/uønskede hendelser, rapportering etc.**

Vennligst postlegg skjemaet i ferdig frankert returkonvolutt så snart som mulig.

**TAKK FOR AT DU SVARTE!**
